# Supplementary material
Source: PubMed Central journal article supplement (PMC3086877)
Supplement: supp_djr076_Suppl_fig1.pdf [file supp_djr076_Suppl_fig1.pdf]

Bladder Cancer

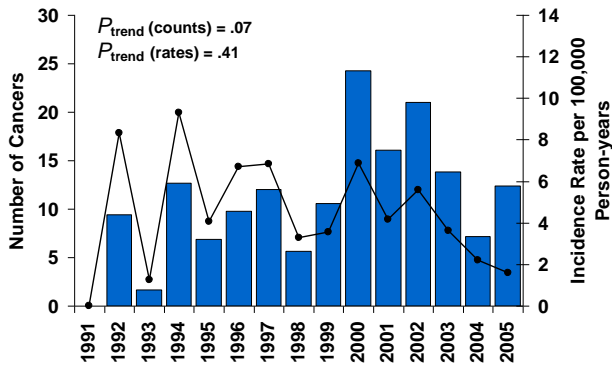

Bone Cancer

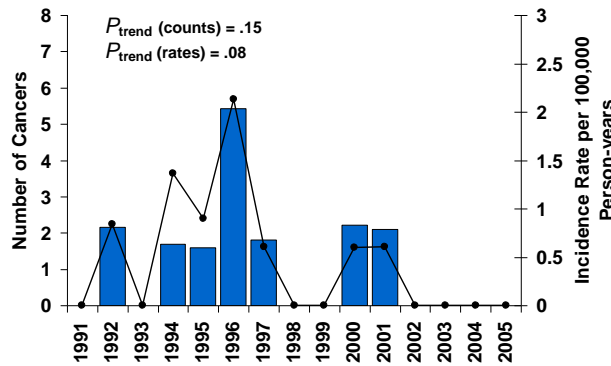

Brain Cancer

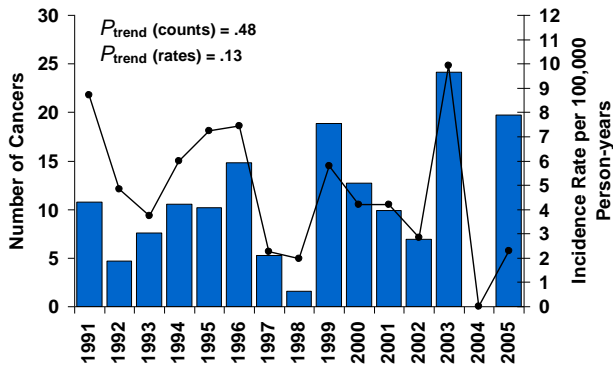

Breast Cancer

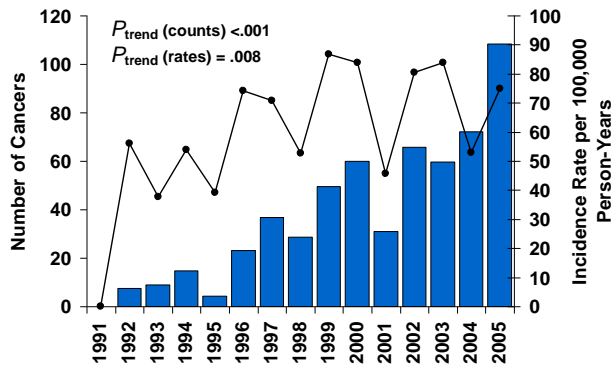

Esophageal Cancer

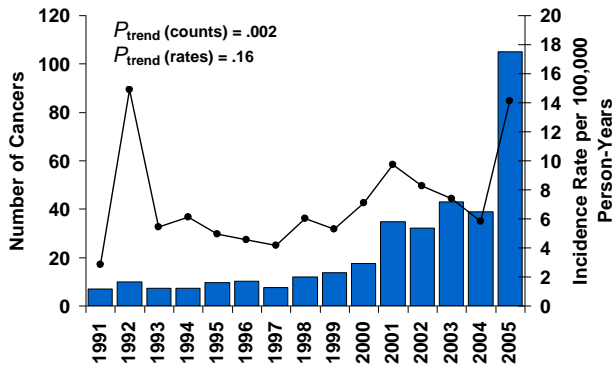

Kidney Cancer

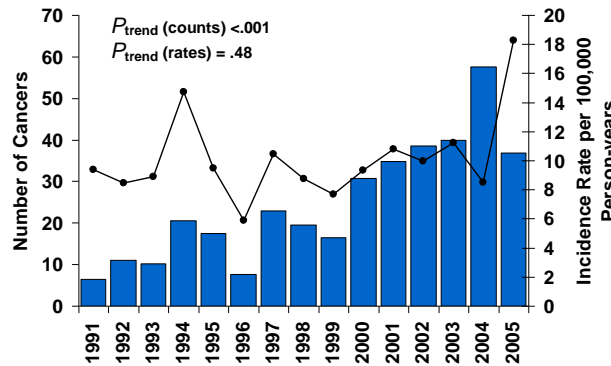

Larynx Cancer

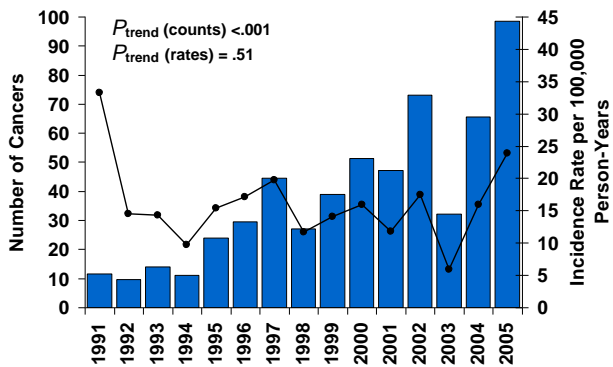

Lymphocytic Leukemia

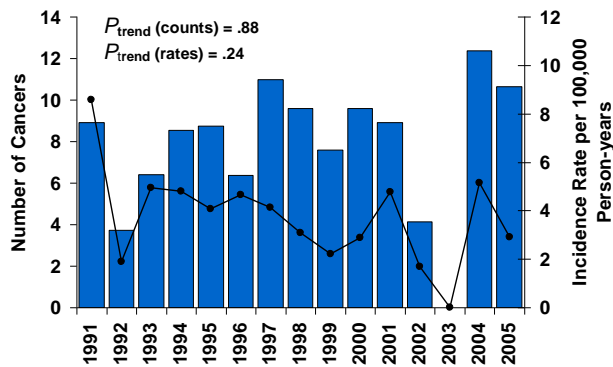

Melanoma

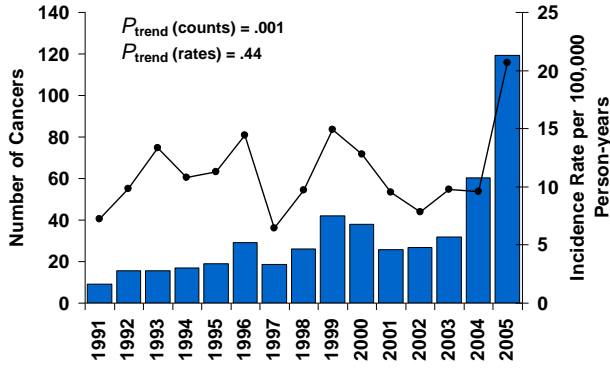

Mesothelioma

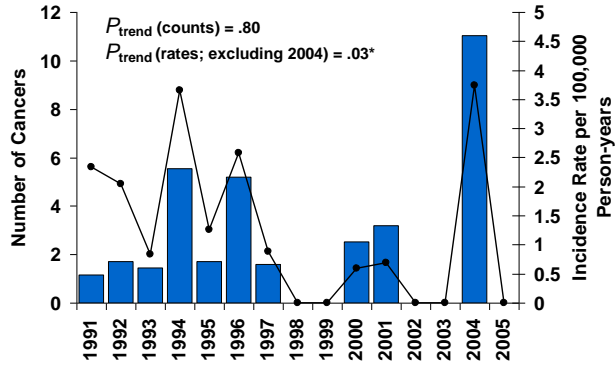

Miscellaneous Cancer

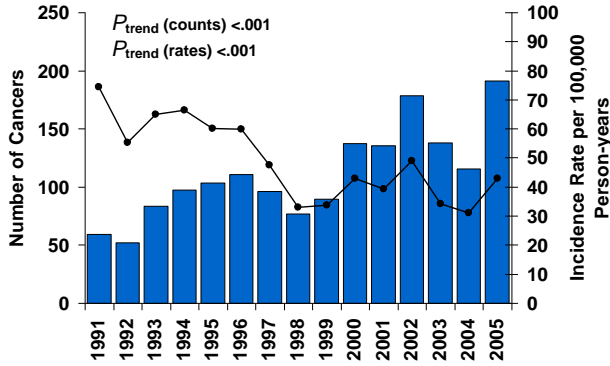

Myeloma

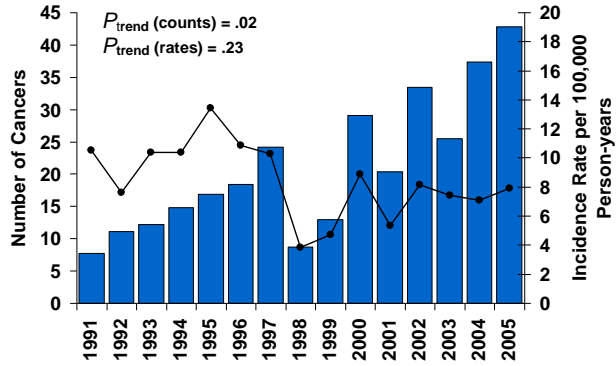

Myeloid and Monocytic Leukemia

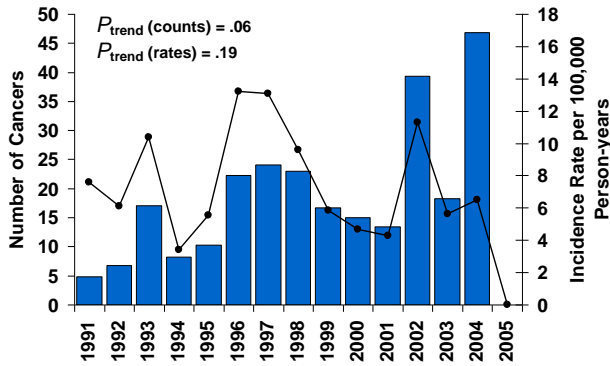

Oral and Pharynx Cancer

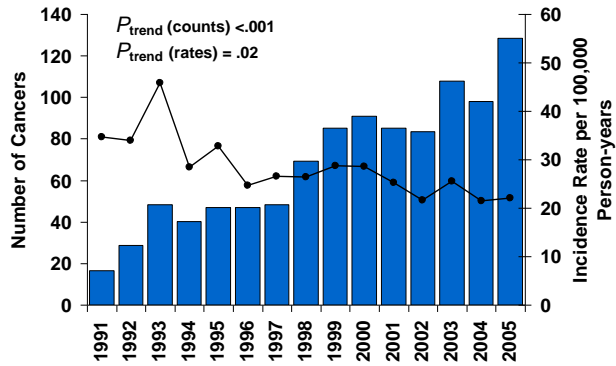

Ovarian Cancer

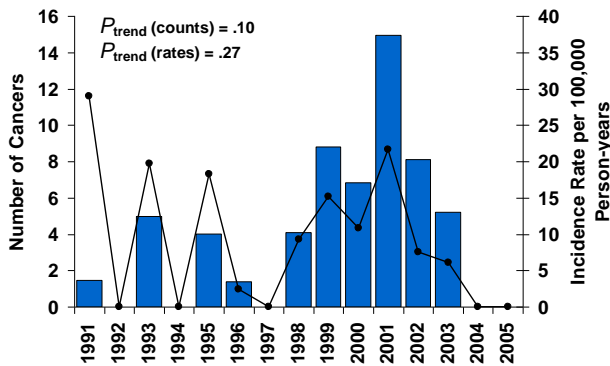

Pancreatic Cancer

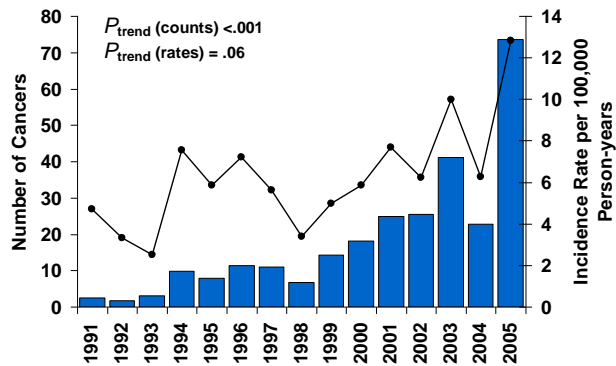

Penis Cancer

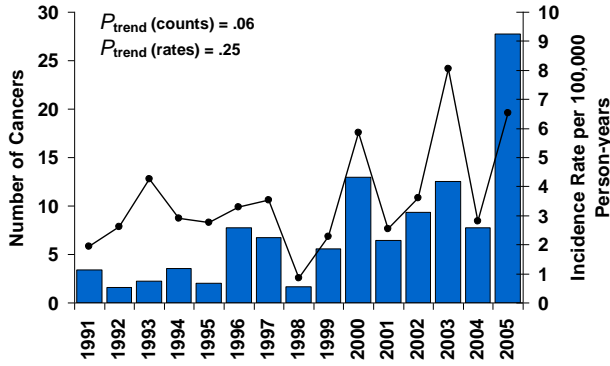

Poorly Specified Cancers

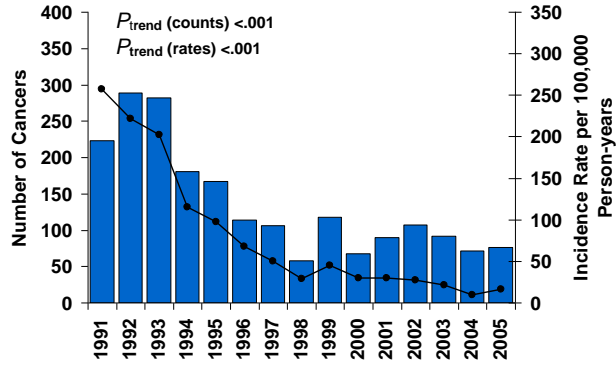

Small Intestine Cancer

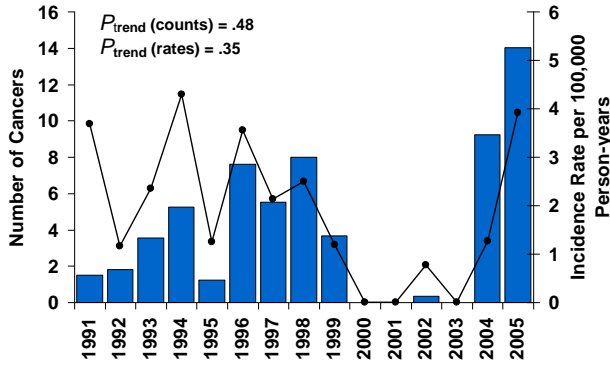

Soft Tissue including Heart Cancer

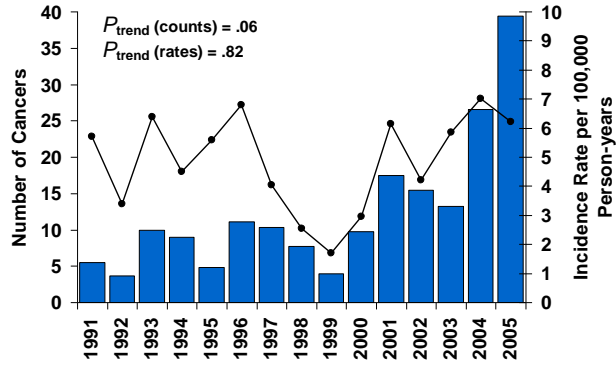

Stomach Cancer

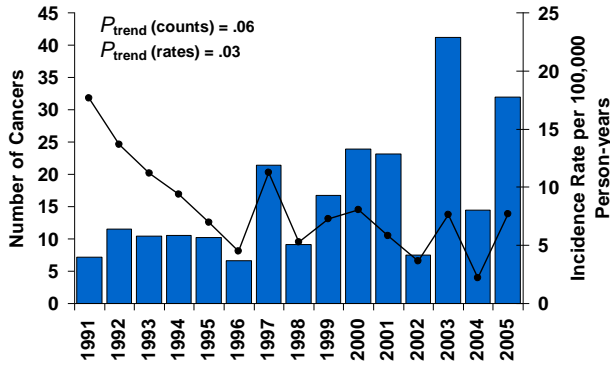

Testicular Cancer

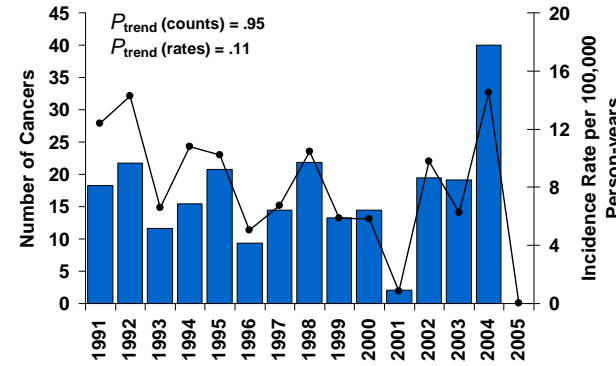

Thyroid Cancer

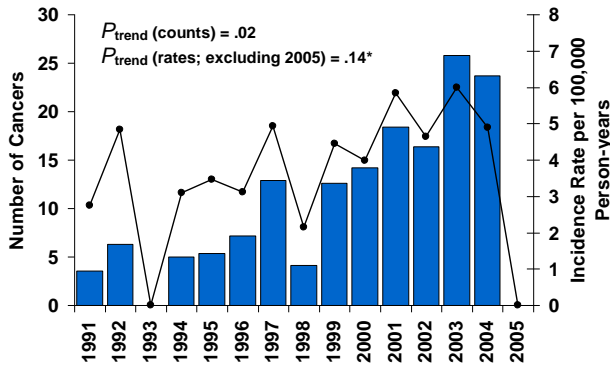

Uterine Corpus Cancer

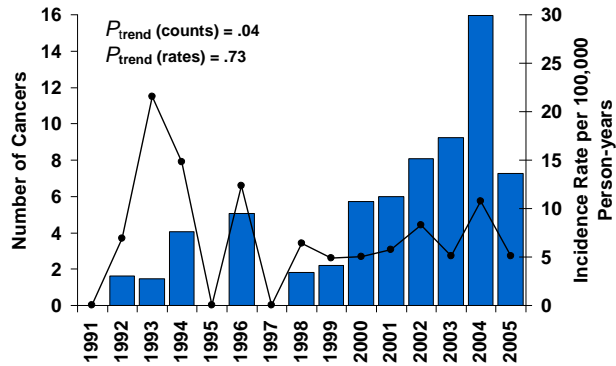

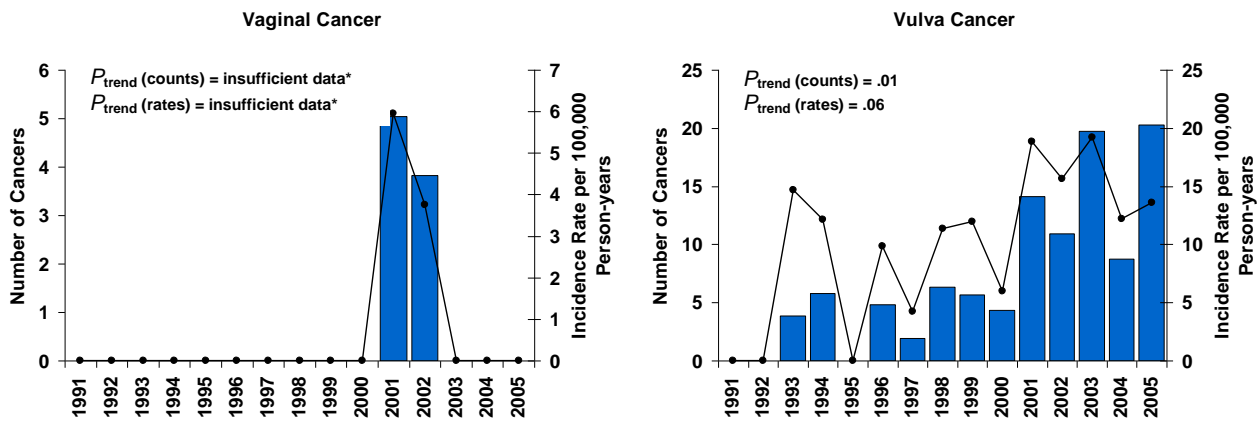

**Supplementary Figure 1. Burden of selected malignancies among people living with AIDS in the United States (1991–2005).** The counts and standardized incidence rates of 26 additional cancers among people living with AIDS in the US, by calendar year, during 1991–2005. Bars depict the number of cancers, and points connected by lines depict incidence rates standardized to the 2000 US AIDS population by age, sex and race. Two-sided  $P$  values for trends in cancer counts and cancer rates were calculated with the chi-square test using linear regression models. Rates for breast, ovary, uterine corpus, vagina and vulva cancers were restricted to women. Rates for penile and testicular cancers were restricted to men. \*The limited data on vaginal cancer prohibited the calculation of a  $P$  value for trend in cancer counts or rates. The rates for both mesothelioma and thyroid cancer were not normally distributed. After visual inspection of the graphs, we excluded 2004 when we estimated the trend in rates for mesothelioma and 2005 when we estimated the trend in rates for thyroid cancer, as we considered these rates to be outliers.
