# Supplementary material
Source: PubMed Central journal article supplement (PMC3086877)
Supplement: supp_djr076_Suppl_table_1and2.pdf [file supp_djr076_Suppl_table_1and2.pdf]

**Supplementary Table 1. Estimated number of cancers, with confidence intervals, among people living with AIDS in the United States (1991–2005)\***

|                                    | Estimated no. of cancers (95% CI)† |                    |           |                    |           |                    |
|------------------------------------|------------------------------------|--------------------|-----------|--------------------|-----------|--------------------|
|                                    | 1991–1995                          |                    | 1996–2000 |                    | 2001–2005 |                    |
| <b>AIDS-defining Cancers</b>       |                                    |                    |           |                    |           |                    |
| Kaposi sarcoma                     | 21,483                             | (21,087 to 21,878) | 5,727     | (5,525 to 5,930)   | 3,827     | (3,462 to 4,191)   |
| Non-Hodgkin lymphoma               | 12,778                             | (12,477 to 13,078) | 7,292     | (7,063 to 7,522)   | 5,968     | (5,505 to 6,431)   |
| Cervix                             | 327                                | (282 to 372)       | 419       | (363 to 475)       | 530       | (398 to 663)       |
| All AIDS-defining cancers          | 34,587                             | (34,089 to 35,086) | 13,439    | (13,127 to 13,750) | 10,325    | (9,721 to 10,929)  |
| <b>Non-AIDS-defining cancers</b>   |                                    |                    |           |                    |           |                    |
| Oral cavity and pharynx            | 181                                | (146 to 216)       | 341       | (291 to 391)       | 503       | (368 to 638)       |
| Esophagus                          | 41                                 | (23 to 60)         | 62        | (40 to 83)         | 254       | (137 to 372)       |
| Stomach                            | 50                                 | (32 to 68)         | 78        | (55 to 101)        | 118       | (52 to 185)        |
| Small intestine                    | 13                                 | (4 to 23)          | 25        | (11 to 38)         | 24        | (0 to 53)          |
| Colorectum                         | 108                                | (80 to 135)        | 230       | (188 to 272)       | 438       | (315 to 560)       |
| Anus                               | 206                                | (168 to 245)       | 770       | (695 to 845)       | 1,564     | (1,330 to 1,798)   |
| Liver                              | 116                                | (88 to 145)        | 261       | (217 to 304)       | 583       | (448 to 718)       |
| Pancreas                           | 25                                 | (13 to 37)         | 62        | (41 to 83)         | 188       | (109 to 267)       |
| Larynx                             | 70                                 | (49 to 92)         | 192       | (155 to 229)       | 317       | (215 to 419)       |
| Lung                               | 875                                | (798 to 952)       | 1,383     | (1,283 to 1,483)   | 1,882     | (1,638 to 2,126)   |
| Bone                               | 5                                  | (0 to 12)          | 9         | (1 to 18)          | 2         | (0 to 6)           |
| Soft tissue including heart        | 33                                 | (17 to 48)         | 43        | (25 to 60)         | 112       | (40 to 184)        |
| Melanoma                           | 76                                 | (53 to 99)         | 154       | (121 to 187)       | 264       | (154 to 374)       |
| Female breast                      | 36                                 | (21 to 51)         | 198       | (159 to 237)       | 337       | (227 to 447)       |
| Uterine corpus                     | 7                                  | (0 to 14)          | 15        | (3 to 26)          | 47        | (12 to 81)         |
| Ovary                              | 10                                 | (3 to 18)          | 21        | (9 to 34)          | 28        | (7 to 49)          |
| Vagina                             | 0                                  | (0 to 0)           | 0         | (0 to 0)           | 9         | (0 to 19)          |
| Vulva                              | 10                                 | (1 to 18)          | 23        | (11 to 36)         | 74        | (30 to 117)        |
| Prostate                           | 87                                 | (63 to 111)        | 322       | (273 to 371)       | 759       | (600 to 918)       |
| Testis                             | 88                                 | (62 to 113)        | 73        | (51 to 96)         | 81        | (28 to 134)        |
| Penis                              | 13                                 | (4 to 22)          | 35        | (19 to 51)         | 64        | (17 to 111)        |
| Bladder                            | 31                                 | (16 to 45)         | 62        | (41 to 84)         | 70        | (29 to 112)        |
| Kidney                             | 66                                 | (45 to 87)         | 97        | (71 to 124)        | 208       | (130 to 286)       |
| Brain                              | 44                                 | (27 to 61)         | 53        | (34 to 73)         | 61        | (14 to 108)        |
| Thyroid                            | 20                                 | (9 to 32)          | 51        | (30 to 72)         | 84        | (39 to 130)        |
| Hodgkin lymphoma                   | 426                                | (371 to 480)       | 682       | (603 to 761)       | 897       | (729 to 1,065)     |
| Myeloma                            | 63                                 | (42 to 83)         | 93        | (67 to 119)        | 159       | (82 to 236)        |
| Lymphocytic leukemia               | 36                                 | (20 to 52)         | 44        | (26 to 63)         | 36        | (2 to 70)          |
| Myeloid and monocytic leukemia     | 47                                 | (28 to 66)         | 101       | (74 to 128)        | 118       | (60 to 176)        |
| Mesothelioma                       | 12                                 | (3 to 20)          | 9         | (1 to 18)          | 14        | (0 to 35)          |
| Miscellaneous                      | 396                                | (343 to 449)       | 511       | (450 to 572)       | 760       | (611 to 908)       |
| All non-AIDS-defining cancers      | 3,193                              | (3,044 to 3,341)   | 6,011     | (5,798 to 6,223)   | 10,059    | (9,477 to 10,640)  |
| <b>Poorly specified malignancy</b> | 1,142                              | (1,040 to 1,244)   | 464       | (407 to 521)       | 438       | (324 to 551)       |
| <b>All cancers combined</b>        | 38,922                             | (38,392 to 39,453) | 19,913    | (19,532 to 20,294) | 20,821    | (19,975 to 21,668) |

\*Estimated total number of cancers (ie, the cancer burden) occurring in the AIDS population in the US in the pre-highly active antiretroviral therapy (HAART) period (1991–1995), early-HAART period (1996–2000) and late-HAART period (2001–2005). Estimates were calculated with data from the HIV/AIDS Cancer Match Study and from Centers for Disease Control and Prevention HIV/AIDS surveillance data. CI = confidence interval.

†Poisson-based 95% confidence intervals were estimated for cancer counts.

**Supplementary Table 2. Estimated number of cancers, with confidence intervals, among people living with HIV-only or AIDS in 34 US states (2004–2007)\***

|                                     | Number of cancers (95% CI)† |                    |          |                  |
|-------------------------------------|-----------------------------|--------------------|----------|------------------|
|                                     |                             | AIDS               | HIV-only |                  |
| <b>AIDS-defining cancers</b>        |                             |                    |          |                  |
| Kaposi sarcoma                      | 2,941                       | (2,826 to 3,055)   | ---      | ---              |
| Non-Hodgkin Lymphoma                | 4,584                       | (4,441 to 4,727)   | ---      | ---              |
| Cervical Cancer                     | 383                         | (340 to 427)       | ---      | ---              |
| All AIDS-defining cancers           | 7,869                       | (7,681 to 8,057)   | ---      | ---              |
| <b>Non-AIDS-defining cancers</b>    |                             |                    |          |                  |
| Oral cavity and pharynx             | 297                         | (260 to 333)       | 103      | (68 to 139)      |
| Esophagus                           | 86                          | (66 to 106)        | 25       | (8 to 42)        |
| Stomach                             | 67                          | (50 to 85)         | 41       | (19 to 63)       |
| Small intestine                     | 12                          | (4 to 19)          | 13       | (0 to 25)        |
| Colorectal                          | 237                         | (205 to 270)       | 135      | (94 to 175)      |
| Anus                                | 751                         | (693 to 809)       | 154      | (111 to 197)     |
| Liver                               | 269                         | (234 to 303)       | 91       | (58 to 124)      |
| Pancreas                            | 76                          | (57 to 94)         | 63       | (35 to 90)       |
| Larynx                              | 161                         | (134 to 187)       | 50       | (26 to 75)       |
| Lung                                | 1,143                       | (1,071 to 1,214)   | 454      | (380 to 528)     |
| Bone                                | 2                           | (0 to 6)           | 9        | (0 to 20)        |
| Soft tissue including heart         | 40                          | (26 to 53)         | 6        | (0 to 15)        |
| Melanoma                            | 120                         | (97 to 143)        | 25       | (8 to 42)        |
| Female breast                       | 203                         | (171 to 235)       | 166      | (123 to 209)     |
| Uterine corpus                      | 19                          | (10 to 29)         | 20       | (5 to 35)        |
| Ovary                               | 31                          | (19 to 43)         | 20       | (5 to 35)        |
| Vagina                              | 4                           | (0 to 8)           | 0        | (0 to 0)         |
| Vulva                               | 39                          | (25 to 53)         | 17       | (3 to 31)        |
| Prostate                            | 271                         | (232 to 310)       | 147      | (95 to 199)      |
| Testis                              | 38                          | (24 to 53)         | 22       | (2 to 42)        |
| Penis                               | 23                          | (11 to 34)         | 4        | (0 to 13)        |
| Bladder                             | 50                          | (35 to 65)         | 19       | (4 to 34)        |
| Kidney                              | 104                         | (82 to 125)        | 75       | (45 to 105)      |
| Brain                               | 45                          | (31 to 60)         | 9        | (0 to 20)        |
| Thyroid                             | 47                          | (32 to 61)         | 34       | (14 to 55)       |
| Hodgkin lymphoma                    | 546                         | (496 to 595)       | 150      | (108 to 193)     |
| Myeloma                             | 71                          | (53 to 89)         | 41       | (19 to 63)       |
| Lymphocytic leukemia                | 29                          | (18 to 40)         | 13       | (0 to 25)        |
| Myeloid/monocytic leukemia          | 67                          | (50 to 85)         | 25       | (8 to 42)        |
| Mesothelioma                        | 6                           | (1 to 11)          | 0        | (0 to 0)         |
| Miscellaneous                       | 431                         | (387 to 474)       | 160      | (116 to 204)     |
| All non to AIDS to defining cancers | 5,372                       | (5,217 to 5,527)   | 2,191    | (2,028 to 2,353) |
| <b>Poorly specified histology</b>   | 340                         | (301 to 379)       | 113      | (76 to 150)      |
| <b>All cancers combined</b>         | 13,581                      | (13,334 to 13,827) | 2,303    | (2,137 to 2,470) |

\*Estimated total number of cancers (ie, cancer burden) occurring in people with AIDS and HIV-only (HIV infection without AIDS) in 34 US states during 2004–2007. Estimates were calculated with data from the HIV/AIDS Cancer Match Study and from Centers for Disease Control and Prevention HIV/AIDS surveillance data. CI = confidence interval.

†Poisson-based 95% confidence intervals were estimated for cancer counts.
